# Supplementary material for: Unique Macrophages Different from M1/M2 Macrophages Inhibit T Cell Mitogenesis while Upregulating Th17 Polarization
Source: PubMed Central journal article supplement — Sci Rep. 2014 Feb 20;4:4146. doi: 10.1038/srep04146 (PMC3930092; doi:10.1038/srep04146), 2014-02-20
Supplement: srep04146-s1.pdf [file srep04146-s1.pdf]

# Unique Macrophages different from M1/M2 Macrophages Inhibit T Cell Mitogenesis while Upregulating Th17 Polarization

Yutaka Tatano, Toshiaki Shimizu, and Haruaki Tomioka

## Supplementary Informations

1. Supplemental Table S1: Effects of MIS-MΦs on Th17 polarization and ROR $\gamma$ t expression by TCR-stimulated T cells under Th17 polarizing condition, when statistically assessed by performing repeated cytofluorometric experiments.

This table indicates the percentage (the mean value  $\pm$  innterexperimental SEM) of Th17 and ROR $\gamma$ t<sup>+</sup> T cell populations generated in response to TCR-stimulation, when T cells were cultured under Th17 polarizing condition with or without MIS-MΦs.

2. Supplemental Table S2: Primers Used in PCR Analysis.

This table indicates the primer sets, used for the real-time RT-PCR experiment performed in the present study.

3. Supplemental Figure S1: Effects of MIS-MΦs on T cell differentiation into Treg and T $\gamma$  $\delta$  cell populations.

This figure demonstrates that MIS-MΦs did not up-regulate the

expansion of Foxp3<sup>+</sup>IL-17A<sup>-</sup> T cells (iTreg cells) and  $\gamma\delta$ TCR<sup>+</sup>IL-17A<sup>+</sup> T cells (IL-17 producing T $\gamma\delta$  cells) under the Th17 polarizing and non-Th17 skewing conditions.

Supplemental Table S1. Effects of MIS-MΦs on Th17 polarization and RORγt expression by TCR-stimulated T cells under Th17 polarizing condition, when statistically assessed by performing repeated cytofluorometric experiments<sup>a</sup>

| T cell population counted by flowcytometry | Cultured cells | Ratio of indicated T cells (% ± SEM) <sup>b</sup> | <i>P</i> value for the difference between T cell + MIS-MΦ and T cell alone |
|--------------------------------------------|----------------|---------------------------------------------------|----------------------------------------------------------------------------|
| CD4 <sup>+</sup> IL-17A <sup>+</sup>       | T cell alone   | 1.5 ± 0.2 <sup>c</sup>                            | 0.021                                                                      |
|                                            | Tcell+MIS-MΦ   | 7.6 ± 1.7 <sup>c</sup>                            |                                                                            |
| RORγt <sup>+</sup> IL-17A <sup>+</sup>     | T cell alone   | 4.2 ± 0.7 <sup>d</sup>                            | 0.006                                                                      |
|                                            | Tcell+MIS-MΦ   | 12.9 ± 3.0 <sup>d</sup>                           |                                                                            |
| RORγt <sup>+</sup> IL-17A <sup>-</sup>     | T cell alone   | 59.6 ± 7.5 <sup>d</sup>                           | 0.085                                                                      |
|                                            | Tcell+MIS-MΦ   | 44.9 ± 5.0 <sup>d</sup>                           |                                                                            |
| RORγt <sup>-</sup> IL-17A <sup>+</sup>     | T cell alone   | 0.4 ± 0.1 <sup>d</sup>                            | 0.108                                                                      |
|                                            | Tcell+MIS-MΦ   | 1.4 ± 0.4 <sup>d</sup>                            |                                                                            |

<sup>a</sup>T cell cultivation and subsequent flowcytometry were performed under the same condition as in indicated Fig. 2.

<sup>b</sup>The mean values measured by separate experiments, which were repeated several times, are indicated with interexperimental SEMs.

<sup>c,d</sup> Cytofluorometric experiments were separately repeated four (c) and seven (d) times, respectively.

Supplemental Table S2. Primers Used in PCR Analysis

| Gene          | Accession number | Primers (5'-3')                                      |
|---------------|------------------|------------------------------------------------------|
| IL12p40       | NM_008352        | GGAAGCACGGCAGCAGAATA<br>AACTTGAGGGAGAAGTAGGAATGG     |
| IL1- $\beta$  | NM_008361        | AAGGGCTGCTTCCAAACCTTTGAC<br>ATACTGCCTGCCTGAAGCTCTTGT |
| IL-6          | NM_031168.1      | TTCCATCCAGTTGCCTTCTT<br>CAGAATTGCCATTGCACAAC         |
| TNF- $\alpha$ | NM_013693        | TTCATGCACCACCATCAAGGACT<br>TGACCACTCTCCCTTTGCAGAACT  |
| NOS2          | NM_010927.3      | CCAAGCCCTCACCTACTTCC<br>CTCTGAGGGCTGACACAAGG         |
| CCR7          | NM_007719.2      | AAAGCACAGCCTTCCTGTGT<br>AGTCCACCGTGGTATTCTCG         |
| IL-10         | NM_010548.2      | GGTTGCCAAGCCTTATCGGA<br>ACCTGCTCCACTGCCTTGCT         |
| Arg-1         | NM_007482.3      | CTCCAAGCCAAAGTCCTTAGAG<br>AGGAGCTGTCATTAGGGACATC     |
| MR            | NM_008625.2      | CCACAGCATTGAGGAGTTTG<br>ACAGCTCATCATTTGGCTCA         |
| Ym1           | M94584           | CACCATGGCCAAGCTCATTCTTGT<br>TATTGGCCTGTCTTAGCCCAACT  |
| Fizz1         | NM_020509.3      | ACTGCCTGTGCTTACTCGTTGACT<br>AAAGCTGGGTTCTCCACCTCTCA  |
| CD163         | NM_001170395.1   | CCTGGATCATCTGTGACAACA<br>TCCACACGTCCAGAACAGTC        |
| GAPDH         | NM_008084.2      | AACTTTGGCATTGTGGAAGG<br>GGATGCAGGGATGATGTTCT         |

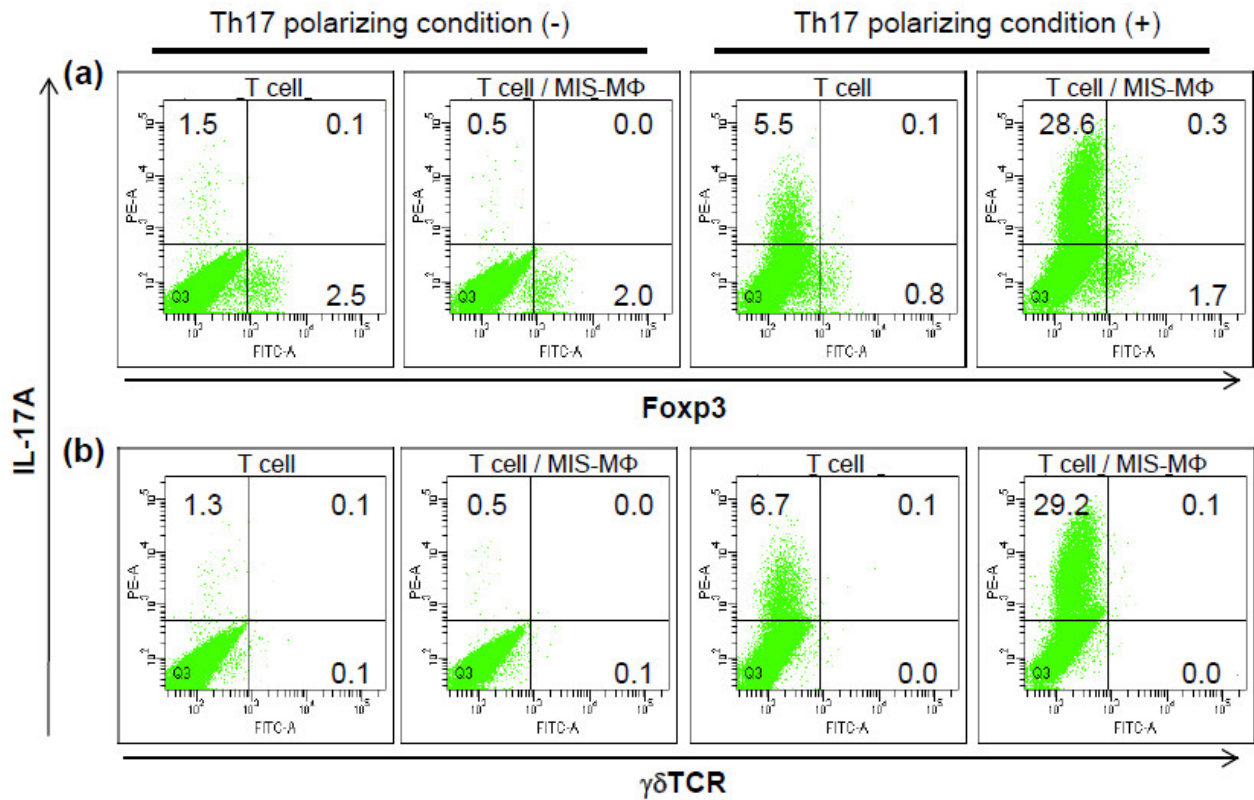

**Supplemental Figure S1. Effects of MIS-MΦs on T cell differentiation into Treg and T $\gamma\delta$  cell populations.** TCR-stimulated T cells were cultured in the presence or absence of a monolayer culture of MIS-MΦs under the Th17 polarizing or non-Th17 skewing conditions. After 5-day cultivation, cultured T cells were subjected to measurement of intracellular expression of IL-17A, Foxp3 (a), and  $\gamma\delta$ TCR (b) as described in Fig. 2. Data are representative of multiple experiments.
